# Supplementary material for: A Disorder-Induced Domino-Like Destabilization Mechanism Governs the Folding and Functional Dynamics of the Repeat Protein IκBα
Source: PLOS journal article supplement (doi:10.1371/journal.pcbi.1003403), 2013-12-19
Supplement: S6 (10.1371/journal.pcbi.1003403.s006) [file journal.pcbi.1003403.s006]

## Supporting Text S1

### A Disorder Induced Domino-Like Destabilization Mechanism Governs the Folding and Functional Dynamics of the Repeat Protein I $\kappa$ B $\alpha$

Srinivasan Sivanandan<sup>1</sup> & Athi N. Naganathan<sup>2\*</sup>

<sup>1</sup>Department of Biotechnology, Indian Institute of Technology Kharagpur, Kharagpur 721302, India.

<sup>2</sup>Department of Biotechnology, Indian Institute of Technology Madras, Chennai 600036, India.

#### The Wako-Saitô-Muñoz-Eaton (WSME) model

The free-energy of a particular microstate ( $m, n$ ) (i.e., a string of 1's between and including  $m$  and  $n$ ) in the WSME model with electrostatics and solvation free-energy [19,21] is given by

$$\Delta F = \sum \Delta G_{m,n}^{stab} - T \sum_m^n \Delta S_{conf} \quad (\text{S.1})$$

The stabilization free-energy of a microstate (first term in the above equation) is represented as a sum of van der Waals interactions ( $E_{vdW}$ ), electrostatic potential ( $E_{elec}$ ) and solvation free-energy ( $\Delta G_{solv}$ ) arising from purely native contributions:

$$\Delta G_{m,n}^{stab} = E_{vdW} + E_{elec} + \Delta G_{solv} \quad (\text{S.2})$$

The second term corresponds to the entropic cost of fixing residues to the native conformation at the temperature  $T$ . The interacting partners that contribute to the van der Waals energy are identified by setting a distance cut-off ( $r_{cut}$ ) to the pair-wise heavy-atom partners ( $i, j$ ) calculated from the PDB file.

$$E_{vdW} = \sum_{m,n} \xi_{i,j} \rho \quad (\text{S.3})$$

where  $\rho = 1$  if  $r_{ij} \leq r_{cut}$  and  $\rho = 0$  otherwise. In atomic-level force-fields the interaction energies are distance dependent but since the WSME model pre-assumes an ensemble derived from the native structure a distance dependent energy is not required. The  $r_{cut}$  was fixed to 6 Å and nearest neighbors were excluded from the contact calculation as before[19,21].

A Debye-Hückel (DH) treatment is employed for the electrostatic potential term:

$$E_{elec} = \sum_{m,n} K_{Coulomb} \frac{q_i q_j}{\epsilon_{eff} r_{ij}} \exp(-r_{ij} \kappa) \quad (\text{S.4})$$

wherein  $K_{Coulomb}$  is the Coulomb constant (1389 kJ.Å/mol),  $q_i$  is the charge on the atom  $i$ ,  $r_{ij}$  is the distance between charge centers  $i$  and  $j$ , and  $\epsilon_{eff}$  is the effective dielectric constant and is fixed to 29.  $1/\kappa$  is the Debye screening length that depends on  $\epsilon_{eff}$ , solvent ionic-strength ( $I$ ) and temperature ( $T$ ) as

$$\kappa^2 = \frac{8\pi e^2 I}{\epsilon_{eff} k_B T} \quad (S.5)$$

where  $k_B$  is the Boltzmann's constant, and  $e$  is the elementary charge. Charges were assigned to atoms according to pH 7.0 protonation state and  $I$  was fixed to the experimental value of 0.05 M[10].

The solvation free-energy is approximated as being proportional to the number of formed contacts ( $x_{cont}^{m,n}$ ) in that microstate with the proportionality constant being  $\Delta C_p^{cont}$ , which is the temperature-independent heat capacity change upon fixing a native contact. Therefore,

$$\Delta G_{solv} = x_{cont}^{m,n} \Delta C_p^{cont} \left[ (T - T_{ref}) - T \ln(T/T_{ref}) \right] \quad (S.6)$$

where  $T_{ref}$  is the reference temperature which is fixed to 385 K[34]. A uniform conformational entropy cost ( $\Delta S_{conf}$ ) is assigned to residues independent of sequence or native secondary-structure.

The partition function ( $Z$ ) is calculated employing the transfer-matrix formalism of Wako and Saitô[16,17]:

$$Z(T) = v_l \left[ \prod_{i=1}^N X_i \right] v_r^tr \quad (S.7)$$

where

$$X_i = \begin{pmatrix} 1 & 1 & 1 & \cdots & 1 & 1 \\ z & 0 & 0 & \cdots & & 0 \\ 0 & H_1^{(i)}z & 0 & & & \vdots \\ & & H_2^{(i)}z & & 0 & 0 \\ & 0 & & & H_{N-2}^{(i)}z & H_{N-1}^{(i)}z \end{pmatrix}$$

$$v_l = (1, 1, 1, \dots, 1)$$

$$v_r = (1, 0, 0, \dots, 0)$$

and

$$H_k^{(i)} = \exp\left(-\beta \sum_{j=1}^k \Delta G^{stab}\right) \quad (k \leq N-i) \quad (\text{S.8})$$

$$H_k^{(i)} = 0 \quad (k > N-i)$$

Here,  $\beta = 1/RT$  and  $z = \exp(\Delta S_{conf}/R)$  where  $R$  is  $8.314 \text{ J mol}^{-1} \text{ K}^{-1}$ . The one-dimensional free-energy profiles are constructed by accumulating the total statistical weight for members of the ensemble with different number of structured residues.

The overall probability of a particular residue to be folded ( $p_f^i$ ) can be obtained from

$$p_f^i = Z^{-1} v_l \left[ \prod_{j=1}^{i-1} X_j \right] \left[ \frac{\partial X_i}{\partial \ln z} \right] \left[ \prod_{j=i+1}^N X_j \right] v_r^{tr} \quad (\text{S.9})$$

The final parameters from fit to the excess heat capacity profile are:  $\Delta S_{conf} = -18.1 \text{ J mol}^{-1} \text{ K}^{-1}$ ,  $\varepsilon = -70.1 \text{ J mol}^{-1}$  while  $\Delta C_p^{cont}$  is fixed to  $-0.358 \text{ J mol}^{-1} \text{ K}^{-1}$  [19].

## Chemical Denaturation

Chemical denaturation effects are introduced by a phenomenological constant that decreases the stabilization free-energy linearly with denaturant concentration ( $[D]$ ):

$$\Delta G_{m,n}^{stab}([D]) = E_{vdW} + E_{elec} + \Delta G_{solv} - x_{cont}^{m,n} m^{cont} [D] \quad (\text{S.10})$$

Other parameters including entropic cost were fixed to the original values extracted from the characterization of temperature-induced denaturation.
